# Supplementary material for: Global synonymous mutagenesis identifies cis-acting RNA elements that regulate HIV-1 splicing and replication
Source: PLoS Pathog. 2018 Jan 29;14(1):e1006824. doi: 10.1371/journal.ppat.1006824 (PMC5805364; doi:10.1371/journal.ppat.1006824)
Supplement: S2 Data — Excel file listing HIV-1NHG nucleotide position, WT and synonymously mutated nucleotide sequence (A though P aggregated into a single sequence), open reading frames, positions of each mutant, splice acceptors and donors, splicing regulatory elements, and other RNA elements. (XLSX) [file ppat.1006824.s005.xlsx]

## Sheet: NHG wt
TGGAAGGGCTAATTCACTCCCAAAGAAGACAAGATATCCTTGATCTGTGGATCTACCACACACAAGGCTACTTCCCTGATTAGCAGAACTACACACCAGGGCCAGGGGTCAGATATCCACTGACCTTTGGATGGTGCTACAAGCTAGTACCAGTTGAGCCAGATAAGGTAGAAGAGGCCAATAAAGGAGAGAACACCAGCTTGTTACACCCTGTGAGCCTGCATGGGATGGATGACCCGGAGAGAGAAGTGTTAGAGTGGAGGTTTGACAGCCGCCTAGCATTTCATCACGTGGCCCGAGAGCTGCATCCGGAGTACTTCAAGAACTGCTGATATCGAGCTTGCTACAAGGGACTTTCCGCTGGGGACTTTCCAGGGAGGCGTGGCCTGGGCGGGACTG…
T	1	1
G	2
G	3
A	4
A	5
G	6
G	7
G	8
C	9
T	10
A	11
A	12
T	13
T	14
C	15
A	16
C	17
T	18
C	19
C	20
C	21
A	22
A	23
A	24
G	25
A	26
A	27
G	28
A	29
C	30
A	31
A	32
G	33
A	34
T	35
A	36
T	37
C	38
C	39
T	40
T	41
G	42
A	43
T	44
C	45
T	46
G	47
T	48
G	49
G	50
A	51
T	52
C	53
T	54
A	55
C	56
C	57
A	58
C	59
A	60
C	61
A	62
C	63
A	64
A	65
G	66
G	67
C	68
T	69
A	70
C	71
T	72
T	73
C	74
C	75
C	76
T	77
G	78
A	79
T	80
T	81
A	82
G	83
C	84
A	85
G	86
A	87
A	88
C	89
T	90
A	91
C	92
A	93
C	94
A	95
C	96
C	97
A	98
G	99
G	100
G	101
C	102
C	103
A	104
G	105
G	106
G	107
G	108
T	109
C	110
A	111
G	112
A	113
T	114
A	115
T	116
C	117
C	118
A	119
C	120
T	121
G	122
A	123
C	124
C	125
T	126
T	127
T	128
G	129
G	130
A	131
T	132
G	133
G	134
T	135
G	136
C	137
T	138
A	139
C	140
A	141
A	142
G	143
C	144
T	145
A	146
G	147
T	148
A	149
C	150
C	151
A	152
G	153
T	154
T	155
G	156
A	157
G	158
C	159
C	160
A	161
G	162
A	163
T	164
A	165
A	166
G	167
G	168
T	169
A	170
G	171
A	172
A	173
G	174
A	175
G	176
G	177
C	178
C	179
A	180
A	181
T	182
A	183
A	184
A	185
G	186
G	187
A	188
G	189
A	190
G	191
A	192
A	193
C	194
A	195
C	196
C	197
A	198
G	199
C	200
T	201
T	202
G	203
T	204
T	205
A	206
C	207
A	208
C	209
C	210
C	211
T	212
G	213
T	214
G	215
A	216
G	217
C	218
C	219
T	220
G	221
C	222
A	223
T	224
G	225
G	226
G	227
A	228
T	229
G	230
G	231
A	232
T	233
G	234
A	235
C	236
C	237
C	238
G	239
G	240
A	241
G	242
A	243
G	244
A	245
G	246
A	247
A	248
G	249
T	250
G	251
T	252
T	253
A	254
G	255
A	256
G	257
T	258
G	259
G	260
A	261
G	262
G	263
T	264
T	265
T	266
G	267
A	268
C	269
A	270
G	271
C	272
C	273
G	274
C	275
C	276
T	277
A	278
G	279
C	280
A	281
T	282
T	283
T	284
C	285
A	286
T	287
C	288
A	289
C	290
G	291
T	292
G	293
G	294
C	295
C	296
C	297
G	298
A	299
G	300
A	301
G	302
C	303
T	304
G	305
C	306
A	307
T	308
C	309
C	310
G	311
G	312
A	313
G	314
T	315
A	316
C	317
T	318
T	319
C	320
A	321
A	322
G	323
A	324
A	325
C	326
T	327
G	328
C	329
T	330
G	331
A	332
T	333
A	334
T	335
C	336
G	337
A	338
G	339
C	340
T	341
T	342
G	343
C	344
T	345
A	346
C	347
A	348
A	349
G	350
G	351
G	352
A	353
C	354
T	355
T	356
T	357
C	358
C	359
G	360
C	361
T	362
G	363
G	364
G	365
G	366
A	367
C	368
T	369
T	370
T	371
C	372
C	373
A	374
G	375
G	376
G	377
A	378
G	379
G	380
C	381
G	382
T	383
G	384
G	385
C	386
C	387
T	388
G	389
G	390
G	391
C	392
G	393
G	394
G	395
A	396
C	397
T	398
G	399
G	400
G	401
G	402
A	403
G	404
T	405
G	406
G	407
C	408
G	409
A	410
G	411
C	412
C	413
C	414
T	415
C	416
A	417
G	418
A	419
T	420
C	421
C	422
T	423
G	424
C	425
A	426
T	427
A	428
T	429
A	430
A	431
G	432
C	433
A	434
G	435
C	436
T	437
G	438
C	439
T	440
T	441
T	442
T	443
T	444
G	445
C	446
C	447
T	448
G	449
T	450
A	451
C	452
T	453
G	454
G	455
G	456
T	457
C	458
T	459
C	460
T	461
C	462
T	463
G	464
G	465
T	466
T	467
A	468
G	469
A	470
C	471
C	472
A	473
G	474
A	475
T	476
C	477
T	478
G	479
A	480
G	481
C	482
C	483
T	484
G	485
G	486
G	487
A	488
G	489
C	490
T	491
C	492
T	493
C	494
T	495
G	496
G	497
C	498
T	499
A	500
A	501
C	502
T	503
A	504
G	505
G	506
G	507
A	508
A	509
C	510
C	511
C	512
A	513
C	514
T	515
G	516
C	517
T	518
T	519
A	520
A	521
G	522
C	523
C	524
T	525
C	526
A	527
A	528
T	529
A	530
A	531
A	532
G	533
C	534
T	535
T	536
G	537
C	538
C	539
T	540
T	541
G	542
A	543
G	544
T	545
G	546
C	547
T	548
T	549
C	550
A	551
A	552
G	553
T	554
A	555
G	556
T	557
G	558
T	559
G	560
T	561
G	562
C	563
C	564
C	565
G	566
T	567
C	568
T	569
G	570
T	571
T	572
G	573
T	574
G	575
T	576
G	577
A	578
C	579
T	580
C	581
T	582
G	583
G	584
T	585
A	586
A	587
C	588
T	589
A	590
G	591
A	592
G	593
A	594
T	595
C	596
C	597
C	598
T	599
C	600
A	601
G	602
A	603
C	604
C	605
C	606
T	607
T	608
T	609
T	610
A	611
G	612
T	613
C	614
A	615
G	616
T	617
G	618
T	619
G	620
G	621
A	622
A	623
A	624
A	625
T	626
C	627
T	628
C	629
T	630
A	631
G	632
C	633
A	634
G	635
T	636
G	637
G	638
C	639
G	640
C	641
C	642
C	643
G	644
A	645
A	646
C	647
A	648
G	649
G	650
G	651
A	652
C	653
T	654
T	655
G	656
A	657
A	658
A	659
G	660
C	661
G	662
A	663
A	664
A	665
G	666
G	667
G	668
A	669
A	670
A	671
C	672
C	673
A	674
G	675
A	676
G	677
G	678
A	679
G	680
C	681
T	682
C	683
T	684
C	685
T	686
C	687
G	688
A	689
C	690
G	691
C	692
A	693
G	694
G	695
A	696
C	697
T	698
C	699
G	700
G	701
C	702
T	703
T	704
G	705
C	706
T	707
G	708
A	709
A	710
G	711
C	712
G	713
C	714
G	715
C	716
A	717
C	718
G	719
G	720
C	721
A	722
A	723
G	724
A	725
G	726
G	727
C	728
G	729
A	730
G	731
G	732
G	733
G	734
C	735
G	736
G	737
C	738
G	739
A	740
C	741
T	742
G	743
G	744
T	745
G	746
A	747
G	748
T	749
A	750
C	751
G	752
C	753
C	754
A	755
A	756
A	757
A	758
A	759
T	760
T	761
T	762
T	763
G	764
A	765
C	766
T	767
A	768
G	769
C	770
G	771
G	772
A	773
G	774
G	775
C	776
T	777
A	778
G	779
A	780
A	781
G	782
G	783
A	784
G	785
A	786
G	787
A	788
G	789
A	790
T	791
G	792
G	793
G	794
T	795
G	796
C	797
G	798
A	799
G	800
A	801
G	802
C	803
G	804
T	805
C	806
G	807
G	808
T	809
A	810
T	811
T	812
A	813
A	814
G	815
C	816
G	817
G	818
G	819
G	820
G	821
A	822
G	823
A	824
A	825
T	826
T	827
A	828
G	829
A	830
T	831
A	832
A	833
A	834
T	835
G	836
G	837
G	838
A	839
A	840
A	841
A	842
A	843
A	844
T	845
T	846
C	847
G	848
G	849
T	850
T	851
A	852
A	853
G	854
G	855
C	856
C	857
A	858
G	859
G	860
G	861
G	862
G	863
A	864
A	865
A	866
G	867
A	868
A	869
A	870
C	871
A	872
A	873
T	874
A	875
T	876
A	877
A	878
A	879
C	880
T	881
A	882
A	883
A	884
A	885
C	886
A	887
T	888
A	889
T	890
A	891
G	892
T	893
A	894
T	895
G	896
G	897
G	898
C	899
A	900
A	901
G	902
C	903
A	904
G	905
G	906
G	907
A	908
G	909
C	910
T	911
A	912
G	913
A	914
A	915
C	916
G	917
A	918
T	919
T	920
C	921
G	922
C	923
A	924
G	925
T	926
T	927
A	928
A	929
T	930
C	931
C	932
T	933
G	934
G	935
C	936
C	937
T	938
T	939
T	940
T	941
A	942
G	943
A	944
G	945
A	946
C	947
A	948
T	949
C	950
A	951
G	952
A	953
A	954
G	955
G	956
C	957
T	958
G	959
T	960
A	961
G	962
A	963
C	964
A	965
A	966
A	967
T	968
A	969
C	970
T	971
G	972
G	973
G	974
A	975
C	976
A	977
G	978
C	979
T	980
A	981
C	982
A	983
A	984
C	985
C	986
A	987
T	988
C	989
C	990
C	991
T	992
T	993
C	994
A	995
G	996
A	997
C	998
A	999
G	1000
G	1001
A	1002
T	1003
C	1004
A	1005
G	1006
A	1007
A	1008
G	1009
A	1010
A	1011
C	1012
T	1013
T	1014
A	1015
G	1016
A	1017
T	1018
C	1019
A	1020
T	1021
T	1022
A	1023
T	1024
A	1025
T	1026
A	1027
A	1028
T	1029
A	1030
C	1031
A	1032
A	1033
T	1034
A	1035
G	1036
C	1037
A	1038
G	1039
T	1040
C	1041
C	1042
T	1043
C	1044
T	1045
A	1046
T	1047
T	1048
G	1049
T	1050
G	1051
T	1052
G	1053
C	1054
A	1055
T	1056
C	1057
A	1058
A	1059
A	1060
G	1061
G	1062
A	1063
T	1064
A	1065
G	1066
A	1067
T	1068
G	1069
T	1070
A	1071
A	1072
A	1073
A	1074
G	1075
A	1076
C	1077
A	1078
C	1079
C	1080
A	1081
A	1082
G	1083
G	1084
A	1085
A	1086
G	1087
C	1088
C	1089
T	1090
T	1091
A	1092
G	1093
A	1094
T	1095
A	1096
A	1097
G	1098
A	1099
T	1100
A	1101
G	1102
A	1103
G	1104
G	1105
A	1106
A	1107
G	1108
A	1109
G	1110
C	1111
A	1112
A	1113
A	1114
A	1115
C	1116
A	1117
A	1118
A	1119
A	1120
G	1121
T	1122
A	1123
A	1124
G	1125
A	1126
A	1127
A	1128
A	1129
A	1130
G	1131
G	1132
C	1133
A	1134
C	1135
A	1136
G	1137
C	1138
A	1139
A	1140
G	1141
C	1142
A	1143
G	1144
C	1145
A	1146
G	1147
C	1148
T	1149
G	1150
A	1151
C	1152
A	1153
C	1154
A	1155
G	1156
G	1157
A	1158
A	1159
A	1160
C	1161
A	1162
A	1163
C	1164
A	1165
G	1166
C	1167
C	1168
A	1169
G	1170
G	1171
T	1172
C	1173
A	1174
G	1175
C	1176
C	1177
A	1178
A	1179
A	1180
A	1181
T	1182
T	1183
A	1184
C	1185
C	1186
C	1187
T	1188
A	1189
T	1190
A	1191
G	1192
T	1193
G	1194
C	1195
A	1196
G	1197
A	1198
A	1199
C	1200
C	1201
T	1202
C	1203
C	1204
A	1205
G	1206
G	1207
G	1208
G	1209
C	1210
A	1211
A	1212
A	1213
T	1214
G	1215
G	1216
T	1217
A	1218
C	1219
A	1220
T	1221
C	1222
A	1223
G	1224
G	1225
C	1226
C	1227
A	1228
T	1229
A	1230
T	1231
C	1232
A	1233
C	1234
C	1235
T	1236
A	1237
G	1238
A	1239
A	1240
C	1241
T	1242
T	1243
T	1244
A	1245
A	1246
A	1247
T	1248
G	1249
C	1250
A	1251
T	1252
G	1253
G	1254
G	1255
T	1256
A	1257
A	1258
A	1259
A	1260
G	1261
T	1262
A	1263
G	1264
T	1265
A	1266
G	1267
A	1268
A	1269
G	1270
A	1271
G	1272
A	1273
A	1274
G	1275
G	1276
C	1277
T	1278
T	1279
T	1280
C	1281
A	1282
G	1283
C	1284
C	1285
C	1286
A	1287
G	1288
A	1289
A	1290
G	1291
T	1292
A	1293
A	1294
T	1295
A	1296
C	1297
C	1298
C	1299
A	1300
T	1301
G	1302
T	1303
T	1304
T	1305
T	1306
C	1307
A	1308
G	1309
C	1310
A	1311
T	1312
T	1313
A	1314
T	1315
C	1316
A	1317
G	1318
A	1319
A	1320
G	1321
G	1322
A	1323
G	1324
C	1325
C	1326
A	1327
C	1328
C	1329
C	1330
C	1331
A	1332
C	1333
A	1334
A	1335
G	1336
A	1337
T	1338
T	1339
T	1340
A	1341
A	1342
A	1343
T	1344
A	1345
C	1346
C	1347
A	1348
T	1349
G	1350
C	1351
T	1352
A	1353
A	1354
A	1355
C	1356
A	1357
C	1358
A	1359
G	1360
T	1361
G	1362
G	1363
G	1364
G	1365
G	1366
G	1367
A	1368
C	1369
A	1370
T	1371
C	1372
A	1373
A	1374
G	1375
C	1376
A	1377
G	1378
C	1379
C	1380
A	1381
T	1382
G	1383
C	1384
A	1385
A	1386
A	1387
T	1388
G	1389
T	1390
T	1391
A	1392
A	1393
A	1394
A	1395
G	1396
A	1397
G	1398
A	1399
C	1400
C	1401
A	1402
T	1403
C	1404
A	1405
A	1406
T	1407
G	1408
A	1409
G	1410
G	1411
A	1412
A	1413
G	1414
C	1415
T	1416
G	1417
C	1418
A	1419
G	1420
A	1421
A	1422
T	1423
G	1424
G	1425
G	1426
A	1427
T	1428
A	1429
G	1430
A	1431
T	1432
T	1433
G	1434
C	1435
A	1436
T	1437
C	1438
C	1439
A	1440
G	1441
T	1442
G	1443
C	1444
A	1445
T	1446
G	1447
C	1448
A	1449
G	1450
G	1451
G	1452
C	1453
C	1454
T	1455
A	1456
T	1457
T	1458
G	1459
C	1460
A	1461
C	1462
C	1463
A	1464
G	1465
G	1466
C	1467
C	1468
A	1469
G	1470
A	1471
T	1472
G	1473
A	1474
G	1475
A	1476
G	1477
A	1478
A	1479
C	1480
C	1481
A	1482
A	1483
G	1484
G	1485
G	1486
G	1487
A	1488
A	1489
G	1490
T	1491
G	1492
A	1493
C	1494
A	1495
T	1496
A	1497
G	1498
C	1499
A	1500
G	1501
G	1502
A	1503
A	1504
C	1505
T	1506
A	1507
C	1508
T	1509
A	1510
G	1511
T	1512
A	1513
C	1514
C	1515
C	1516
T	1517
T	1518
C	1519
A	1520
G	1521
G	1522
A	1523
A	1524
C	1525
A	1526
A	1527
A	1528
T	1529
A	1530
G	1531
G	1532
A	1533
T	1534
G	1535
G	1536
A	1537
T	1538
G	1539
A	1540
C	1541
A	1542
C	1543
A	1544
T	1545
A	1546
A	1547
T	1548
C	1549
C	1550
A	1551
C	1552
C	1553
T	1554
A	1555
T	1556
C	1557
C	1558
C	1559
A	1560
G	1561
T	1562
A	1563
G	1564
G	1565
A	1566
G	1567
A	1568
A	1569
A	1570
T	1571
C	1572
T	1573
A	1574
T	1575
A	1576
A	1577
A	1578
A	1579
G	1580
A	1581
T	1582
G	1583
G	1584
A	1585
T	1586
A	1587
A	1588
T	1589
C	1590
C	1591
T	1592
G	1593
G	1594
G	1595
A	1596
T	1597
T	1598
A	1599
A	1600
A	1601
T	1602
A	1603
A	1604
A	1605
A	1606
T	1607
A	1608
G	1609
T	1610
A	1611
A	1612
G	1613
A	1614
A	1615
T	1616
G	1617
T	1618
A	1619
T	1620
A	1621
G	1622
C	1623
C	1624
C	1625
T	1626
A	1627
C	1628
C	1629
A	1630
G	1631
C	1632
A	1633
T	1634
T	1635
C	1636
T	1637
G	1638
G	1639
A	1640
C	1641
A	1642
T	1643
A	1644
A	1645
G	1646
A	1647
C	1648
A	1649
A	1650
G	1651
G	1652
A	1653
C	1654
C	1655
A	1656
A	1657
A	1658
G	1659
G	1660
A	1661
A	1662
C	1663
C	1664
C	1665
T	1666
T	1667
T	1668
A	1669
G	1670
A	1671
G	1672
A	1673
C	1674
T	1675
A	1676
T	1677
G	1678
T	1679
A	1680
G	1681
A	1682
C	1683
C	1684
G	1685
A	1686
T	1687
T	1688
C	1689
T	1690
A	1691
T	1692
A	1693
A	1694
A	1695
A	1696
C	1697
T	1698
C	1699
T	1700
A	1701
A	1702
G	1703
A	1704
G	1705
C	1706
C	1707
G	1708
A	1709
G	1710
C	1711
A	1712
A	1713
G	1714
C	1715
T	1716
T	1717
C	1718
A	1719
C	1720
A	1721
A	1722
G	1723
A	1724
G	1725
G	1726
T	1727
A	1728
A	1729
A	1730
A	1731
A	1732
A	1733
T	1734
T	1735
G	1736
G	1737
A	1738
T	1739
G	1740
A	1741
C	1742
A	1743
G	1744
A	1745
A	1746
A	1747
C	1748
C	1749
T	1750
T	1751
G	1752
T	1753
T	1754
G	1755
G	1756
T	1757
C	1758
C	1759
A	1760
A	1761
A	1762
A	1763
T	1764
G	1765
C	1766
G	1767
A	1768
A	1769
C	1770
C	1771
C	1772
A	1773
G	1774
A	1775
T	1776
T	1777
G	1778
T	1779
A	1780
A	1781
G	1782
A	1783
C	1784
T	1785
A	1786
T	1787
T	1788
T	1789
T	1790
A	1791
A	1792
A	1793
A	1794
G	1795
C	1796
A	1797
T	1798
T	1799
G	1800
G	1801
G	1802
A	1803
C	1804
C	1805
A	1806
G	1807
G	1808
A	1809
G	1810
C	1811
G	1812
A	1813
C	1814
A	1815
C	1816
T	1817
A	1818
G	1819
A	1820
A	1821
G	1822
A	1823
A	1824
A	1825
T	1826
G	1827
A	1828
T	1829
G	1830
A	1831
C	1832
A	1833
G	1834
C	1835
A	1836
T	1837
G	1838
T	1839
C	1840
A	1841
G	1842
G	1843
G	1844
A	1845
G	1846
T	1847
G	1848
G	1849
G	1850
G	1851
G	1852
G	1853
A	1854
C	1855
C	1856
C	1857
G	1858
G	1859
C	1860
C	1861
A	1862
T	1863
A	1864
A	1865
A	1866
G	1867
C	1868
A	1869
A	1870
G	1871
A	1872
G	1873
T	1874
T	1875
T	1876
T	1877
G	1878
G	1879
C	1880
T	1881
G	1882
A	1883
A	1884
G	1885
C	1886
A	1887
A	1888
T	1889
G	1890
A	1891
G	1892
C	1893
C	1894
A	1895
A	1896
G	1897
T	1898
A	1899
A	1900
C	1901
A	1902
A	1903
A	1904
T	1905
C	1906
C	1907
A	1908
G	1909
C	1910
T	1911
A	1912
C	1913
C	1914
A	1915
T	1916
A	1917
A	1918
T	1919
G	1920
A	1921
T	1922
A	1923
C	1924
A	1925
G	1926
A	1927
A	1928
A	1929
G	1930
G	1931
C	1932
A	1933
A	1934
T	1935
T	1936
T	1937
T	1938
A	1939
G	1940
G	1941
A	1942
A	1943
C	1944
C	1945
A	1946
A	1947
A	1948
G	1949
A	1950
A	1951
A	1952
G	1953
A	1954
C	1955
T	1956
G	1957
T	1958
T	1959
A	1960
A	1961
G	1962
T	1963
G	1964
T	1965
T	1966
T	1967
C	1968
A	1969
A	1970
T	1971
T	1972
G	1973
T	1974
G	1975
G	1976
C	1977
A	1978
A	1979
A	1980
G	1981
A	1982
A	1983
G	1984
G	1985
G	1986
C	1987
A	1988
C	1989
A	1990
T	1991
A	1992
G	1993
C	1994
C	1995
A	1996
A	1997
A	1998
A	1999
[truncated: 8,262 more rows]

## Sheet: NHG Mutant
TGGAAGGGCTAATTCACTCCCAAAGAAGACAAGATATCCTTGATCTGTGGATCTACCACACACAAGGCTACTTCCCTGATTAGCAGAACTACACACCAGGGCCAGGGGTCAGATATCCACTGACCTTTGGATGGTGCTACAAGCTAGTACCAGTTGAGCCAGATAAGGTAGAAGAGGCCAATAAAGGAGAGAACACCAGCTTGTTACACCCTGTGAGCCTGCATGGGATGGATGACCCGGAGAGAGAAGTGTTAGAGTGGAGGTTTGACAGCCGCCTAGCATTTCATCACGTGGCCCGAGAGCTGCATCCGGAGTACTTCAAGAACTGCTGATATCGAGCTTGCTACAAGGGACTTTCCGCTGGGGACTTTCCAGGGAGGCGTGGCCTGGGCGGGACTG…
T	1	1
G	2
G	3
A	4
A	5
G	6
G	7
G	8
C	9
T	10
A	11
A	12
T	13
T	14
C	15
A	16
C	17
T	18
C	19
C	20
C	21
A	22
A	23
A	24
G	25
A	26
A	27
G	28
A	29
C	30
A	31
A	32
G	33
A	34
T	35
A	36
T	37
C	38
C	39
T	40
T	41
G	42
A	43
T	44
C	45
T	46
G	47
T	48
G	49
G	50
A	51
T	52
C	53
T	54
A	55
C	56
C	57
A	58
C	59
A	60
C	61
A	62
C	63
A	64
A	65
G	66
G	67
C	68
T	69
A	70
C	71
T	72
T	73
C	74
C	75
C	76
T	77
G	78
A	79
T	80
T	81
A	82
G	83
C	84
A	85
G	86
A	87
A	88
C	89
T	90
A	91
C	92
A	93
C	94
A	95
C	96
C	97
A	98
G	99
G	100
G	101
C	102
C	103
A	104
G	105
G	106
G	107
G	108
T	109
C	110
A	111
G	112
A	113
T	114
A	115
T	116
C	117
C	118
A	119
C	120
T	121
G	122
A	123
C	124
C	125
T	126
T	127
T	128
G	129
G	130
A	131
T	132
G	133
G	134
T	135
G	136
C	137
T	138
A	139
C	140
A	141
A	142
G	143
C	144
T	145
A	146
G	147
T	148
A	149
C	150
C	151
A	152
G	153
T	154
T	155
G	156
A	157
G	158
C	159
C	160
A	161
G	162
A	163
T	164
A	165
A	166
G	167
G	168
T	169
A	170
G	171
A	172
A	173
G	174
A	175
G	176
G	177
C	178
C	179
A	180
A	181
T	182
A	183
A	184
A	185
G	186
G	187
A	188
G	189
A	190
G	191
A	192
A	193
C	194
A	195
C	196
C	197
A	198
G	199
C	200
T	201
T	202
G	203
T	204
T	205
A	206
C	207
A	208
C	209
C	210
C	211
T	212
G	213
T	214
G	215
A	216
G	217
C	218
C	219
T	220
G	221
C	222
A	223
T	224
G	225
G	226
G	227
A	228
T	229
G	230
G	231
A	232
T	233
G	234
A	235
C	236
C	237
C	238
G	239
G	240
A	241
G	242
A	243
G	244
A	245
G	246
A	247
A	248
G	249
T	250
G	251
T	252
T	253
A	254
G	255
A	256
G	257
T	258
G	259
G	260
A	261
G	262
G	263
T	264
T	265
T	266
G	267
A	268
C	269
A	270
G	271
C	272
C	273
G	274
C	275
C	276
T	277
A	278
G	279
C	280
A	281
T	282
T	283
T	284
C	285
A	286
T	287
C	288
A	289
C	290
G	291
T	292
G	293
G	294
C	295
C	296
C	297
G	298
A	299
G	300
A	301
G	302
C	303
T	304
G	305
C	306
A	307
T	308
C	309
C	310
G	311
G	312
A	313
G	314
T	315
A	316
C	317
T	318
T	319
C	320
A	321
A	322
G	323
A	324
A	325
C	326
T	327
G	328
C	329
T	330
G	331
A	332
T	333
A	334
T	335
C	336
G	337
A	338
G	339
C	340
T	341
T	342
G	343
C	344
T	345
A	346
C	347
A	348
A	349
G	350
G	351
G	352
A	353
C	354
T	355
T	356
T	357
C	358
C	359
G	360
C	361
T	362
G	363
G	364
G	365
G	366
A	367
C	368
T	369
T	370
T	371
C	372
C	373
A	374
G	375
G	376
G	377
A	378
G	379
G	380
C	381
G	382
T	383
G	384
G	385
C	386
C	387
T	388
G	389
G	390
G	391
C	392
G	393
G	394
G	395
A	396
C	397
T	398
G	399
G	400
G	401
G	402
A	403
G	404
T	405
G	406
G	407
C	408
G	409
A	410
G	411
C	412
C	413
C	414
T	415
C	416
A	417
G	418
A	419
T	420
C	421
C	422
T	423
G	424
C	425
A	426
T	427
A	428
T	429
A	430
A	431
G	432
C	433
A	434
G	435
C	436
T	437
G	438
C	439
T	440
T	441
T	442
T	443
T	444
G	445
C	446
C	447
T	448
G	449
T	450
A	451
C	452
T	453
G	454
G	455
G	456
T	457
C	458
T	459
C	460
T	461
C	462
T	463
G	464
G	465
T	466
T	467
A	468
G	469
A	470
C	471
C	472
A	473
G	474
A	475
T	476
C	477
T	478
G	479
A	480
G	481
C	482
C	483
T	484
G	485
G	486
G	487
A	488
G	489
C	490
T	491
C	492
T	493
C	494
T	495
G	496
G	497
C	498
T	499
A	500
A	501
C	502
T	503
A	504
G	505
G	506
G	507
A	508
A	509
C	510
C	511
C	512
A	513
C	514
T	515
G	516
C	517
T	518
T	519
A	520
A	521
G	522
C	523
C	524
T	525
C	526
A	527
A	528
T	529
A	530
A	531
A	532
G	533
C	534
T	535
T	536
G	537
C	538
C	539
T	540
T	541
G	542
A	543
G	544
T	545
G	546
C	547
T	548
T	549
C	550
A	551
A	552
G	553
T	554
A	555
G	556
T	557
G	558
T	559
G	560
T	561
G	562
C	563
C	564
C	565
G	566
T	567
C	568
T	569
G	570
T	571
T	572
G	573
T	574
G	575
T	576
G	577
A	578
C	579
T	580
C	581
T	582
G	583
G	584
T	585
A	586
A	587
C	588
T	589
A	590
G	591
A	592
G	593
A	594
T	595
C	596
C	597
C	598
T	599
C	600
A	601
G	602
A	603
C	604
C	605
C	606
T	607
T	608
T	609
T	610
A	611
G	612
T	613
C	614
A	615
G	616
T	617
G	618
T	619
G	620
G	621
A	622
A	623
A	624
A	625
T	626
C	627
T	628
C	629
T	630
A	631
G	632
C	633
A	634
G	635
T	636
G	637
G	638
C	639
G	640
C	641
C	642
C	643
G	644
A	645
A	646
C	647
A	648
G	649
G	650
G	651
A	652
C	653
T	654
T	655
G	656
A	657
A	658
A	659
G	660
C	661
G	662
A	663
A	664
A	665
G	666
G	667
G	668
A	669
A	670
A	671
C	672
C	673
A	674
G	675
A	676
G	677
G	678
A	679
G	680
C	681
T	682
C	683
T	684
C	685
T	686
C	687
G	688
A	689
C	690
G	691
C	692
A	693
G	694
G	695
A	696
C	697
T	698
C	699
G	700
G	701
C	702
T	703
T	704
G	705
C	706
T	707
G	708
A	709
A	710
G	711
C	712
G	713
C	714
G	715
C	716
A	717
C	718
G	719
G	720
C	721
A	722
A	723
G	724
A	725
G	726
G	727
C	728
G	729
A	730
G	731
G	732
G	733
G	734
C	735
G	736
G	737
C	738
G	739
A	740
C	741
T	742
G	743
G	744
T	745
G	746
A	747
G	748
T	749
A	750
C	751
G	752
C	753
C	754
A	755
A	756
A	757
A	758
A	759
T	760
T	761
T	762
T	763
G	764
A	765
C	766
T	767
A	768
G	769
C	770
G	771
G	772
A	773
G	774
G	775
C	776
T	777
A	778
G	779
A	780
A	781
G	782
G	783
A	784
G	785
A	786
G	787
A	788
G	789
A	790
T	791
G	792
G	793
G	794
T	795
G	796
C	797
G	798
A	799
G	800
A	801
G	802
C	803
G	804
T	805
C	806
G	807
G	808
T	809
A	810
C	811
T	812
T	813
T	814
C	815
G	816
G	817
G	818
C	819
G	820
G	821
C	822
G	823
A	824
A	825
C	826
T	827
T	828
G	829
A	830
C	831
A	832
A	833
A	834
T	835
G	836
G	837
G	838
A	839
A	840
A	841
A	842
A	843
A	844
T	845
A	846
C	847
G	848
C	849
C	850
T	851
T	852
C	853
G	854
C	855
C	856
C	857
T	858
G	859
G	860
C	861
G	862
G	863
C	864
A	865
A	866
A	867
A	868
A	869
A	870
C	871
A	872
A	873
T	874
A	875
C	876
A	877
A	878
A	879
C	880
T	881
T	882
A	883
A	884
A	885
C	886
A	887
C	888
A	889
T	890
T	891
G	892
T	893
T	894
T	895
G	896
G	897
G	898
C	899
T	900
T	901
C	902
G	903
C	904
G	905
C	906
G	907
A	908
A	909
C	910
T	911
T	912
G	913
A	914
A	915
C	916
G	917
C	918
T	919
T	920
T	921
G	922
C	923
T	924
G	925
T	926
G	927
A	928
A	929
C	930
C	931
C	932
G	933
G	934
G	935
G	936
C	937
T	938
A	939
C	940
T	941
T	942
G	943
A	944
A	945
A	946
C	947
T	948
T	949
C	950
T	951
G	952
A	953
A	954
G	955
G	956
A	957
T	958
G	959
C	960
C	961
G	962
C	963
C	964
A	965
A	966
A	967
T	968
T	969
C	970
T	971
T	972
G	973
G	974
C	975
C	976
A	977
A	978
C	979
T	980
T	981
C	982
A	983
A	984
C	985
C	986
T	987
T	988
C	989
G	990
C	991
T	992
G	993
C	994
A	995
A	996
A	997
C	998
T	999
G	1000
G	1001
C	1002
T	1003
C	1004
T	1005
G	1006
A	1007
A	1008
G	1009
A	1010
A	1011
C	1012
T	1013
G	1014
C	1015
G	1016
C	1017
T	1018
C	1019
T	1020
C	1021
T	1022
T	1023
T	1024
A	1025
C	1026
A	1027
A	1028
C	1029
A	1030
C	1031
T	1032
A	1033
T	1034
T	1035
G	1036
C	1037
T	1038
G	1039
T	1040
G	1041
C	1042
T	1043
A	1044
T	1045
A	1046
C	1047
T	1048
G	1049
C	1050
G	1051
T	1052
T	1053
C	1054
A	1055
C	1056
C	1057
A	1058
A	1059
C	1060
G	1061
C	1062
A	1063
T	1064
T	1065
G	1066
A	1067
C	1068
G	1069
T	1070
T	1071
A	1072
A	1073
A	1074
G	1075
A	1076
T	1077
A	1078
C	1079
G	1080
A	1081
A	1082
G	1083
G	1084
A	1085
A	1086
G	1087
C	1088
A	1089
C	1090
T	1091
T	1092
G	1093
A	1094
C	1095
A	1096
A	1097
A	1098
A	1099
T	1100
T	1101
G	1102
A	1103
G	1104
G	1105
A	1106
A	1107
G	1108
A	1109
A	1110
C	1111
A	1112
A	1113
A	1114
A	1115
T	1116
A	1117
A	1118
A	1119
T	1120
C	1121
G	1122
A	1123
A	1124
A	1125
A	1126
A	1127
A	1128
A	1129
A	1130
G	1131
G	1132
C	1133
T	1134
C	1135
A	1136
A	1137
C	1138
A	1139
A	1140
G	1141
C	1142
T	1143
G	1144
C	1145
T	1146
G	1147
C	1148
G	1149
G	1150
A	1151
T	1152
A	1153
C	1154
T	1155
G	1156
G	1157
C	1158
A	1159
A	1160
T	1161
A	1162
A	1163
T	1164
T	1165
C	1166
G	1167
C	1168
A	1169
G	1170
G	1171
T	1172
G	1173
A	1174
G	1175
C	1176
C	1177
A	1178
A	1179
A	1180
A	1181
C	1182
T	1183
A	1184
T	1185
C	1186
C	1187
G	1188
A	1189
T	1190
T	1191
G	1192
T	1193
T	1194
C	1195
A	1196
A	1197
A	1198
A	1199
T	1200
C	1201
T	1202
G	1203
C	1204
A	1205
G	1206
G	1207
G	1208
C	1209
C	1210
A	1211
A	1212
A	1213
T	1214
G	1215
G	1216
T	1217
T	1218
C	1219
A	1220
C	1221
C	1222
A	1223
G	1224
G	1225
C	1226
G	1227
A	1228
T	1229
T	1230
T	1231
C	1232
T	1233
C	1234
C	1235
G	1236
C	1237
G	1238
C	1239
A	1240
C	1241
A	1242
C	1243
T	1244
T	1245
A	1246
A	1247
C	1248
G	1249
C	1250
T	1251
T	1252
G	1253
G	1254
G	1255
T	1256
T	1257
A	1258
A	1259
A	1260
G	1261
T	1262
T	1263
G	1264
T	1265
T	1266
G	1267
A	1268
A	1269
G	1270
A	1271
A	1272
A	1273
A	1274
G	1275
G	1276
C	1277
A	1278
T	1279
T	1280
T	1281
T	1282
C	1283
G	1284
C	1285
C	1286
T	1287
G	1288
A	1289
A	1290
G	1291
T	1292
T	1293
A	1294
T	1295
T	1296
C	1297
C	1298
G	1299
A	1300
T	1301
G	1302
T	1303
T	1304
C	1305
T	1306
C	1307
T	1308
G	1309
C	1310
T	1311
C	1312
T	1313
T	1314
T	1315
C	1316
T	1317
G	1318
A	1319
A	1320
G	1321
G	1322
C	1323
G	1324
C	1325
G	1326
A	1327
C	1328
G	1329
C	1330
C	1331
T	1332
C	1333
A	1334
A	1335
G	1336
A	1337
C	1338
C	1339
T	1340
T	1341
A	1342
A	1343
C	1344
A	1345
C	1346
G	1347
A	1348
T	1349
G	1350
C	1351
T	1352
T	1353
A	1354
A	1355
T	1356
A	1357
C	1358
T	1359
G	1360
T	1361
T	1362
G	1363
G	1364
C	1365
G	1366
G	1367
C	1368
C	1369
A	1370
C	1371
C	1372
A	1373
A	1374
G	1375
C	1376
T	1377
G	1378
C	1379
G	1380
A	1381
T	1382
G	1383
C	1384
A	1385
A	1386
A	1387
T	1388
G	1389
C	1390
T	1391
T	1392
A	1393
A	1394
A	1395
G	1396
A	1397
A	1398
A	1399
C	1400
G	1401
A	1402
T	1403
A	1404
A	1405
A	1406
C	1407
G	1408
A	1409
G	1410
G	1411
A	1412
A	1413
G	1414
C	1415
G	1416
G	1417
C	1418
T	1419
G	1420
A	1421
A	1422
T	1423
G	1424
G	1425
G	1426
A	1427
C	1428
C	1429
G	1430
C	1431
C	1432
T	1433
T	1434
C	1435
A	1436
C	1437
C	1438
C	1439
T	1440
G	1441
T	1442
T	1443
C	1444
A	1445
C	1446
G	1447
C	1448
T	1449
G	1450
G	1451
C	1452
C	1453
C	1454
G	1455
A	1456
T	1457
C	1458
G	1459
C	1460
T	1461
C	1462
C	1463
T	1464
G	1465
G	1466
G	1467
C	1468
A	1469
A	1470
A	1471
T	1472
G	1473
C	1474
G	1475
C	1476
G	1477
A	1478
A	1479
C	1480
C	1481
T	1482
C	1483
G	1484
C	1485
G	1486
G	1487
C	1488
T	1489
C	1490
G	1491
G	1492
A	1493
T	1494
A	1495
T	1496
T	1497
G	1498
C	1499
T	1500
G	1501
G	1502
C	1503
A	1504
C	1505
G	1506
A	1507
C	1508
T	1509
A	1510
G	1511
T	1512
A	1513
C	1514
G	1515
C	1516
T	1517
G	1518
C	1519
A	1520
G	1521
G	1522
A	1523
A	1524
C	1525
A	1526
A	1527
A	1528
T	1529
T	1530
G	1531
G	1532
C	1533
T	1534
G	1535
G	1536
A	1537
T	1538
G	1539
A	1540
C	1541
T	1542
C	1543
A	1544
C	1545
A	1546
A	1547
C	1548
C	1549
C	1550
T	1551
C	1552
C	1553
G	1554
A	1555
T	1556
A	1557
C	1558
C	1559
T	1560
G	1561
T	1562
T	1563
G	1564
G	1565
C	1566
G	1567
A	1568
A	1569
A	1570
T	1571
A	1572
T	1573
A	1574
C	1575
A	1576
A	1577
A	1578
C	1579
G	1580
C	1581
T	1582
G	1583
G	1584
A	1585
T	1586
T	1587
A	1588
T	1589
A	1590
C	1591
T	1592
T	1593
G	1594
G	1595
C	1596
C	1597
T	1598
T	1599
A	1600
A	1601
C	1602
A	1603
A	1604
A	1605
A	1606
T	1607
T	1608
G	1609
T	1610
T	1611
C	1612
G	1613
C	1614
A	1615
T	1616
G	1617
T	1618
A	1619
C	1620
T	1621
C	1622
G	1623
C	1624
C	1625
G	1626
A	1627
C	1628
G	1629
A	1630
G	1631
C	1632
A	1633
T	1634
A	1635
C	1636
T	1637
T	1638
G	1639
A	1640
T	1641
A	1642
T	1643
T	1644
C	1645
G	1646
C	1647
C	1648
A	1649
A	1650
G	1651
G	1652
C	1653
C	1654
C	1655
T	1656
A	1657
A	1658
G	1659
G	1660
A	1661
A	1662
C	1663
C	1664
A	1665
T	1666
T	1667
C	1668
C	1669
G	1670
C	1671
G	1672
A	1673
T	1674
T	1675
A	1676
C	1677
G	1678
T	1679
T	1680
G	1681
A	1682
T	1683
C	1684
G	1685
C	1686
T	1687
T	1688
T	1689
T	1690
A	1691
C	1692
A	1693
A	1694
A	1695
A	1696
C	1697
G	1698
C	1699
T	1700
T	1701
C	1702
G	1703
C	1704
G	1705
C	1706
G	1707
G	1708
A	1709
A	1710
C	1711
A	1712
A	1713
G	1714
C	1715
A	1716
T	1717
C	1718
T	1719
C	1720
A	1721
A	1722
G	1723
A	1724
G	1725
G	1726
T	1727
T	1728
A	1729
A	1730
A	1731
A	1732
A	1733
C	1734
T	1735
G	1736
G	1737
A	1738
T	1739
G	1740
A	1741
C	1742
T	1743
G	1744
A	1745
A	1746
A	1747
C	1748
A	1749
C	1750
T	1751
T	1752
C	1753
T	1754
T	1755
G	1756
T	1757
G	1758
C	1759
A	1760
A	1761
A	1762
A	1763
C	1764
G	1765
C	1766
T	1767
A	1768
A	1769
T	1770
C	1771
C	1772
T	1773
G	1774
A	1775
C	1776
T	1777
G	1778
C	1779
A	1780
A	1781
A	1782
A	1783
C	1784
G	1785
A	1786
T	1787
A	1788
C	1789
T	1790
T	1791
A	1792
A	1793
A	1794
G	1795
C	1796
T	1797
C	1798
T	1799
T	1800
G	1801
G	1802
C	1803
C	1804
C	1805
T	1806
G	1807
G	1808
C	1809
G	1810
C	1811
T	1812
A	1813
C	1814
T	1815
C	1816
T	1817
T	1818
G	1819
A	1820
A	1821
G	1822
A	1823
A	1824
A	1825
T	1826
G	1827
A	1828
T	1829
G	1830
A	1831
C	1832
T	1833
G	1834
C	1835
T	1836
T	1837
G	1838
C	1839
C	1840
A	1841
G	1842
G	1843
G	1844
C	1845
G	1846
T	1847
T	1848
G	1849
G	1850
C	1851
G	1852
G	1853
C	1854
C	1855
C	1856
G	1857
G	1858
G	1859
G	1860
C	1861
A	1862
C	1863
A	1864
A	1865
A	1866
G	1867
C	1868
T	1869
C	1870
G	1871
C	1872
G	1873
T	1874
A	1875
C	1876
T	1877
T	1878
G	1879
C	1880
G	1881
G	1882
A	1883
A	1884
G	1885
C	1886
T	1887
A	1888
T	1889
G	1890
A	1891
G	1892
C	1893
C	1894
A	1895
A	1896
G	1897
T	1898
T	1899
A	1900
C	1901
T	1902
A	1903
A	1904
C	1905
C	1906
C	1907
T	1908
G	1909
C	1910
G	1911
A	1912
C	1913
G	1914
A	1915
T	1916
T	1917
A	1918
T	1919
G	1920
A	1921
T	1922
T	1923
C	1924
A	1925
A	1926
A	1927
A	1928
A	1929
G	1930
G	1931
G	1932
A	1933
A	1934
C	1935
T	1936
T	1937
C	1938
C	1939
G	1940
C	1941
A	1942
A	1943
T	1944
C	1945
A	1946
A	1947
C	1948
G	1949
C	1950
A	1951
A	1952
A	1953
A	1954
C	1955
G	1956
G	1957
T	1958
G	1959
A	1960
A	1961
A	1962
T	1963
G	1964
C	1965
T	1966
T	1967
T	1968
A	1969
A	1970
C	1971
T	1972
G	1973
C	1974
G	1975
G	1976
G	1977
A	1978
A	1979
A	1980
G	1981
A	1982
A	1983
G	1984
G	1985
C	1986
C	1987
A	1988
T	1989
A	1990
T	1991
T	1992
G	1993
C	1994
G	1995
A	1996
A	1997
A	1998
A	1999
[truncated: 8,262 more rows]

## Sheet: Summary
nt position	pNHG wt	pNHG Mutant	ORF #1	ORF #2	ORF #3	Mutants	Novel candidate SRE	SA/SD	SRE	Other RNA Elements
1	T	T
2	G	G
3	G	G
4	A	A
5	A	A
6	G	G
7	G	G
8	G	G
9	C	C
10	T	T
11	A	A
12	A	A
13	T	T
14	T	T
15	C	C
16	A	A
17	C	C
18	T	T
19	C	C
20	C	C
21	C	C
22	A	A
23	A	A
24	A	A
25	G	G
26	A	A
27	A	A
28	G	G
29	A	A
30	C	C
31	A	A
32	A	A
33	G	G
34	A	A
35	T	T
36	A	A
37	T	T
38	C	C
39	C	C
40	T	T
41	T	T
42	G	G
43	A	A
44	T	T
45	C	C
46	T	T
47	G	G
48	T	T
49	G	G
50	G	G
51	A	A
52	T	T
53	C	C
54	T	T
55	A	A
56	C	C
57	C	C
58	A	A
59	C	C
60	A	A
61	C	C
62	A	A
63	C	C
64	A	A
65	A	A
66	G	G
67	G	G
68	C	C
69	T	T
70	A	A
71	C	C
72	T	T
73	T	T
74	C	C
75	C	C
76	C	C
77	T	T
78	G	G
79	A	A
80	T	T
81	T	T
82	A	A
83	G	G
84	C	C
85	A	A
86	G	G
87	A	A
88	A	A
89	C	C
90	T	T
91	A	A
92	C	C
93	A	A
94	C	C
95	A	A
96	C	C
97	C	C
98	A	A
99	G	G
100	G	G
101	G	G
102	C	C
103	C	C
104	A	A
105	G	G
106	G	G
107	G	G
108	G	G
109	T	T
110	C	C
111	A	A
112	G	G
113	A	A
114	T	T
115	A	A
116	T	T
117	C	C
118	C	C
119	A	A
120	C	C
121	T	T
122	G	G
123	A	A
124	C	C
125	C	C
126	T	T
127	T	T
128	T	T
129	G	G
130	G	G
131	A	A
132	T	T
133	G	G
134	G	G
135	T	T
136	G	G
137	C	C
138	T	T
139	A	A
140	C	C
141	A	A
142	A	A
143	G	G
144	C	C
145	T	T
146	A	A
147	G	G
148	T	T
149	A	A
150	C	C
151	C	C
152	A	A
153	G	G
154	T	T
155	T	T
156	G	G
157	A	A
158	G	G
159	C	C
160	C	C
161	A	A
162	G	G
163	A	A
164	T	T
165	A	A
166	A	A
167	G	G
168	G	G
169	T	T
170	A	A
171	G	G
172	A	A
173	A	A
174	G	G
175	A	A
176	G	G
177	G	G
178	C	C
179	C	C
180	A	A
181	A	A
182	T	T
183	A	A
184	A	A
185	A	A
186	G	G
187	G	G
188	A	A
189	G	G
190	A	A
191	G	G
192	A	A
193	A	A
194	C	C
195	A	A
196	C	C
197	C	C
198	A	A
199	G	G
200	C	C
201	T	T
202	T	T
203	G	G
204	T	T
205	T	T
206	A	A
207	C	C
208	A	A
209	C	C
210	C	C
211	C	C
212	T	T
213	G	G
214	T	T
215	G	G
216	A	A
217	G	G
218	C	C
219	C	C
220	T	T
221	G	G
222	C	C
223	A	A
224	T	T
225	G	G
226	G	G
227	G	G
228	A	A
229	T	T
230	G	G
231	G	G
232	A	A
233	T	T
234	G	G
235	A	A
236	C	C
237	C	C
238	C	C
239	G	G
240	G	G
241	A	A
242	G	G
243	A	A
244	G	G
245	A	A
246	G	G
247	A	A
248	A	A
249	G	G
250	T	T
251	G	G
252	T	T
253	T	T
254	A	A
255	G	G
256	A	A
257	G	G
258	T	T
259	G	G
260	G	G
261	A	A
262	G	G
263	G	G
264	T	T
265	T	T
266	T	T
267	G	G
268	A	A
269	C	C
270	A	A
271	G	G
272	C	C
273	C	C
274	G	G
275	C	C
276	C	C
277	T	T
278	A	A
279	G	G
280	C	C
281	A	A
282	T	T
283	T	T
284	T	T
285	C	C
286	A	A
287	T	T
288	C	C
289	A	A
290	C	C
291	G	G
292	T	T
293	G	G
294	G	G
295	C	C
296	C	C
297	C	C
298	G	G
299	A	A
300	G	G
301	A	A
302	G	G
303	C	C
304	T	T
305	G	G
306	C	C
307	A	A
308	T	T
309	C	C
310	C	C
311	G	G
312	G	G
313	A	A
314	G	G
315	T	T
316	A	A
317	C	C
318	T	T
319	T	T
320	C	C
321	A	A
322	A	A
323	G	G
324	A	A
325	A	A
326	C	C
327	T	T
328	G	G
329	C	C
330	T	T
331	G	G
332	A	A
333	T	T
334	A	A
335	T	T
336	C	C
337	G	G
338	A	A
339	G	G
340	C	C
341	T	T
342	T	T
343	G	G
344	C	C
345	T	T
346	A	A
347	C	C
348	A	A
349	A	A
350	G	G
351	G	G
352	G	G
353	A	A
354	C	C
355	T	T
356	T	T
357	T	T
358	C	C
359	C	C
360	G	G
361	C	C
362	T	T
363	G	G
364	G	G
365	G	G
366	G	G
367	A	A
368	C	C
369	T	T
370	T	T
371	T	T
372	C	C
373	C	C
374	A	A
375	G	G
376	G	G
377	G	G
378	A	A
379	G	G
380	G	G
381	C	C
382	G	G
383	T	T
384	G	G
385	G	G
386	C	C
387	C	C
388	T	T
389	G	G
390	G	G
391	G	G
392	C	C
393	G	G
394	G	G
395	G	G
396	A	A
397	C	C
398	T	T
399	G	G
400	G	G
401	G	G
402	G	G
403	A	A
404	G	G
405	T	T
406	G	G
407	G	G
408	C	C
409	G	G
410	A	A
411	G	G
412	C	C
413	C	C
414	C	C
415	T	T
416	C	C
417	A	A
418	G	G
419	A	A
420	T	T
421	C	C
422	C	C
423	T	T
424	G	G
425	C	C
426	A	A
427	T	T
428	A	A
429	T	T
430	A	A
431	A	A
432	G	G
433	C	C
434	A	A
435	G	G
436	C	C
437	T	T
438	G	G
439	C	C
440	T	T
441	T	T
442	T	T
443	T	T
444	T	T
445	G	G
446	C	C
447	C	C
448	T	T
449	G	G
450	T	T
451	A	A
452	C	C
453	T	T
454	G	G
455	G	G
456	G	G
457	T	T
458	C	C
459	T	T
460	C	C
461	T	T
462	C	C
463	T	T
464	G	G
465	G	G
466	T	T
467	T	T
468	A	A
469	G	G
470	A	A
471	C	C
472	C	C
473	A	A
474	G	G
475	A	A
476	T	T
477	C	C
478	T	T
479	G	G
480	A	A
481	G	G
482	C	C
483	C	C
484	T	T
485	G	G
486	G	G
487	G	G
488	A	A
489	G	G
490	C	C
491	T	T
492	C	C
493	T	T
494	C	C
495	T	T
496	G	G
497	G	G
498	C	C
499	T	T
500	A	A
501	A	A
502	C	C
503	T	T
504	A	A
505	G	G
506	G	G
507	G	G
508	A	A
509	A	A
510	C	C
511	C	C
512	C	C
513	A	A
514	C	C
515	T	T
516	G	G
517	C	C
518	T	T
519	T	T
520	A	A
521	A	A
522	G	G
523	C	C
524	C	C
525	T	T
526	C	C
527	A	A
528	A	A
529	T	T
530	A	A
531	A	A
532	A	A
533	G	G
534	C	C
535	T	T
536	T	T
537	G	G
538	C	C
539	C	C
540	T	T
541	T	T
542	G	G
543	A	A
544	G	G
545	T	T
546	G	G
547	C	C
548	T	T
549	T	T
550	C	C
551	A	A
552	A	A
553	G	G
554	T	T
555	A	A
556	G	G
557	T	T
558	G	G
559	T	T
560	G	G
561	T	T
562	G	G
563	C	C
564	C	C
565	C	C
566	G	G
567	T	T
568	C	C
569	T	T
570	G	G
571	T	T
572	T	T
573	G	G
574	T	T
575	G	G
576	T	T
577	G	G
578	A	A
579	C	C
580	T	T
581	C	C
582	T	T
583	G	G
584	G	G
585	T	T
586	A	A
587	A	A
588	C	C
589	T	T
590	A	A
591	G	G
592	A	A
593	G	G
594	A	A
595	T	T
596	C	C
597	C	C
598	C	C
599	T	T
600	C	C
601	A	A
602	G	G
603	A	A
604	C	C
605	C	C
606	C	C
607	T	T
608	T	T
609	T	T
610	T	T
611	A	A
612	G	G
613	T	T
614	C	C
615	A	A
616	G	G
617	T	T
618	G	G
619	T	T
620	G	G
621	G	G
622	A	A
623	A	A
624	A	A
625	A	A
626	T	T
627	C	C
628	T	T
629	C	C
630	T	T
631	A	A
632	G	G
633	C	C
634	A	A
635	G	G
636	T	T
637	G	G
638	G	G
639	C	C
640	G	G
641	C	C
642	C	C
643	C	C
644	G	G
645	A	A
646	A	A
647	C	C
648	A	A
649	G	G
650	G	G
651	G	G
652	A	A
653	C	C
654	T	T
655	T	T
656	G	G
657	A	A
658	A	A
659	A	A
660	G	G
661	C	C
662	G	G
663	A	A
664	A	A
665	A	A
666	G	G
667	G	G
668	G	G
669	A	A
670	A	A
671	A	A
672	C	C
673	C	C
674	A	A
675	G	G
676	A	A
677	G	G
678	G	G
679	A	A
680	G	G
681	C	C
682	T	T
683	C	C
684	T	T
685	C	C
686	T	T
687	C	C
688	G	G
689	A	A
690	C	C
691	G	G
692	C	C
693	A	A
694	G	G
695	G	G
696	A	A
697	C	C
698	T	T
699	C	C
700	G	G
701	G	G
702	C	C
703	T	T
704	T	T
705	G	G
706	C	C
707	T	T
708	G	G
709	A	A
710	A	A
711	G	G
712	C	C
713	G	G
714	C	C
715	G	G
716	C	C
717	A	A
718	C	C
719	G	G
720	G	G
721	C	C
722	A	A
723	A	A
724	G	G
725	A	A
726	G	G
727	G	G
728	C	C
729	G	G
730	A	A
731	G	G
732	G	G
733	G	G
734	G	G
735	C	C
736	G	G
737	G	G
738	C	C
739	G	G
740	A	A
741	C	C						D1
742	T	T
743	G	G
744	G	G
745	T	T
746	G	G
747	A	A
748	G	G
749	T	T
750	A	A
751	C	C
752	G	G
753	C	C
754	C	C
755	A	A
756	A	A
757	A	A
758	A	A
759	A	A
760	T	T
761	T	T
762	T	T
763	T	T
764	G	G
765	A	A
766	C	C
767	T	T
768	A	A
769	G	G
770	C	C
771	G	G
772	G	G
773	A	A
774	G	G
775	G	G
776	C	C
777	T	T
778	A	A
779	G	G
780	A	A
781	A	A
782	G	G
783	G	G
784	A	A
785	G	G
786	A	A
787	G	G
788	A	A
789	G	G
790	A	A	GAG
791	T	T
792	G	G
793	G	G
794	G	G
795	T	T
796	G	G
797	C	C
798	G	G
799	A	A
800	G	G
801	A	A
802	G	G
803	C	C
804	G	G
805	T	T
806	C	C
807	G	G
808	G	G
809	T	T
810	A	A
811	T	C				A
812	T	T
813	A	T
814	A	T
815	G	C
816	C	G
817	G	G
818	G	G
819	G	C					A: C819T
820	G	G
821	G	G
822	A	C
823	G	G
824	A	A
825	A	A
826	T	C
827	T	T
828	A	T
829	G	G
830	A	A
831	T	C
832	A	A
833	A	A
834	A	A
835	T	T
836	G	G
837	G	G
838	G	G
839	A	A
840	A	A
841	A	A
842	A	A
843	A	A
844	A	A
845	T	T
846	T	A
847	C	C
848	G	G
849	G	C
850	T	C
851	T	T
852	A	T
853	A	C
854	G	G
855	G	C
856	C	C
857	C	C
858	A	T
859	G	G
860	G	G
861	G	C
862	G	G
863	G	G
864	A	C
865	A	A
866	A	A
867	G	A
868	A	A
869	A	A
870	A	A
871	C	C
872	A	A
873	A	A
874	T	T
875	A	A
876	T	C
877	A	A
878	A	A
879	A	A
880	C	C
881	T	T
882	A	T
883	A	A
884	A	A
885	A	A
886	C	C
887	A	A
888	T	C
889	A	A
890	T	T
891	A	T
892	G	G
893	T	T
894	A	T
895	T	T
896	G	G
897	G	G
898	G	G
899	C	C
900	A	T
901	A	T
902	G	C
903	C	G
904	A	C
905	G	G
906	G	C
907	G	G
908	A	A
909	G	A
910	C	C
911	T	T
912	A	T
913	G	G
914	A	A
915	A	A
916	C	C
917	G	G
918	A	C
919	T	T
920	T	T
921	C	T
922	G	G
923	C	C
924	A	T
925	G	G
926	T	T
927	T	G
928	A	A
929	A	A
930	T	C
931	C	C
932	C	C
933	T	G
934	G	G
935	G	G
936	C	G
937	C	C
938	T	T
939	T	A
940	T	C
941	T	T
942	A	T
943	G	G
944	A	A
945	G	A
946	A	A
947	C	C
948	A	T
949	T	T
950	C	C
951	A	T
952	G	G
953	A	A
954	A	A						A955
955	G	G
956	G	G
957	C	A
958	T	T
959	G	G
960	T	C
961	A	C
962	G	G
963	A	C
964	C	C
965	A	A
966	A	A
967	A	A
968	T	T
969	A	T
970	C	C
971	T	T
972	G	T
973	G	G
974	G	G
975	A	C
976	C	C
977	A	A
978	G	A
979	C	C
980	T	T
981	A	T
982	C	C
983	A	A
984	A	A
985	C	C
986	C	C
987	A	T
988	T	T
989	C	C
990	C	G
991	C	C
992	T	T
993	T	G
994	C	C
995	A	A
996	G	A
997	A	A
998	C	C
999	A	T
1000	G	G
1001	G	G
1002	A	C
1003	T	T
1004	C	C
1005	A	T
1006	G	G
1007	A	A
1008	A	A
1009	G	G
1010	A	A
1011	A	A
1012	C	C
1013	T	T
1014	T	G
1015	A	C
1016	G	G
1017	A	C
1018	T	T
1019	C	C
1020	A	T
1021	T	C
1022	T	T
1023	A	T
1024	T	T
1025	A	A
1026	T	C
1027	A	A
1028	A	A
1029	T	C
1030	A	A
1031	C	C
1032	A	T
1033	A	A
1034	T	T
1035	A	T
1036	G	G
1037	C	C
1038	A	T
1039	G	G
1040	T	T
1041	C	G
1042	C	C
1043	T	T
1044	C	A
1045	T	T
1046	A	A
1047	T	C
1048	T	T
1049	G	G
1050	T	C
1051	G	G
1052	T	T
1053	G	T
1054	C	C
1055	A	A
1056	T	C
1057	C	C
1058	A	A
1059	A	A
1060	A	C
1061	G	G
1062	G	C
1063	A	A
1064	T	T
1065	A	T
1066	G	G
1067	A	A
1068	T	C
1069	G	G
1070	T	T
1071	A	T
1072	A	A
1073	A	A
1074	A	A
1075	G	G
1076	A	A
1077	C	T
1078	A	A
1079	C	C
1080	C	G
1081	A	A
1082	A	A
1083	G	G
1084	G	G
1085	A	A
1086	A	A
1087	G	G
1088	C	C
1089	C	A
1090	T	C
1091	T	T
1092	A	T
1093	G	G
1094	A	A
1095	T	C
1096	A	A
1097	A	A
1098	G	A
1099	A	A
1100	T	T
1101	A	T
1102	G	G
1103	A	A
1104	G	G
1105	G	G
1106	A	A
1107	A	A
1108	G	G
1109	A	A
1110	G	A
1111	C	C
1112	A	A
1113	A	A
1114	A	A
1115	A	A
1116	C	T
1117	A	A
1118	A	A
1119	A	A
1120	A	T
1121	G	C
1122	T	G
1123	A	A
1124	A	A
1125	G	A
1126	A	A
1127	A	A
1128	A	A
1129	A	A
1130	A	A
1131	G	G
1132	G	G
1133	C	C
1134	A	T
1135	C	C
1136	A	A
1137	G	A
1138	C	C
1139	A	A
1140	A	A
1141	G	G
1142	C	C
1143	A	T
1144	G	G
1145	C	C
1146	A	T
1147	G	G
1148	C	C
1149	T	G				B
1150	G	G
1151	A	A
1152	C	T
1153	A	A
1154	C	C
1155	A	T
1156	G	G
1157	G	G
1158	A	C
1159	A	A
1160	A	A
1161	C	T
1162	A	A
1163	A	A
1164	C	T
1165	A	T
1166	G	C
1167	C	G
1168	C	C
1169	A	A
1170	G	G
1171	G	G						D1169?
1172	T	T
1173	C	G
1174	A	A
1175	G	G
1176	C	C
1177	C	C
1178	A	A
1179	A	A
1180	A	A
1181	A	A
1182	T	C
1183	T	T
1184	A	A
1185	C	T
1186	C	C
1187	C	C
1188	T	G
1189	A	A
1190	T	T
1191	A	T
1192	G	G
1193	T	T
1194	G	T
1195	C	C
1196	A	A
1197	G	A
1198	A	A
1199	A	A
1200	C	T
1201	C	C
1202	T	T
1203	C	G
1204	C	C
1205	A	A
1206	G	G
1207	G	G
1208	G	G
1209	G	C
1210	C	C
1211	A	A
1212	A	A
1213	A	A
1214	T	T
1215	G	G
1216	G	G
1217	T	T
1218	A	T
1219	C	C
1220	A	A
1221	T	C
1222	C	C
1223	A	A
1224	G	G
1225	G	G
1226	C	C
1227	C	G
1228	A	A
1229	T	T
1230	A	T
1231	T	T
1232	C	C
1233	A	T
1234	C	C
1235	C	C
1236	T	G
1237	A	C
1238	G	G
1239	A	C
1240	A	A
1241	C	C
1242	T	A
1243	T	C
1244	T	T
1245	A	T
1246	A	A
1247	A	A
1248	T	C
1249	G	G
1250	C	C
1251	A	T
1252	T	T
1253	G	G
1254	G	G
1255	G	G
1256	T	T
1257	A	T
1258	A	A
1259	A	A
1260	A	A
1261	G	G
1262	T	T
1263	A	T
1264	G	G
1265	T	T
1266	A	T
1267	G	G
1268	A	A
1269	A	A
1270	G	G
1271	A	A
1272	G	A
1273	A	A
1274	A	A
1275	G	G
1276	G	G
1277	C	C
1278	T	A
1279	T	T
1280	T	T
1281	C	T
1282	A	T
1283	G	C
1284	C	G
1285	C	C
1286	C	C
1287	A	T
1288	G	G
1289	A	A
1290	A	A
1291	G	G
1292	T	T
1293	A	T
1294	A	A
1295	T	T
1296	A	T
1297	C	C
1298	C	C
1299	C	G
1300	A	A
1301	T	T
1302	G	G
1303	T	T
1304	T	T
1305	T	C
1306	T	T
1307	C	C
1308	A	T
1309	G	G
1310	C	C
1311	A	T					B: T1311C
1312	T	C
1313	T	T
1314	A	T
1315	T	T
1316	C	C
1317	A	T
1318	G	G
1319	A	A
1320	A	A						A1321
1321	G	G
1322	G	G
1323	A	C
1324	G	G
1325	C	C
1326	C	G					B: G1326A
1327	A	A
1328	C	C
1329	C	G
1330	C	C
1331	C	C
1332	A	T
1333	C	C
1334	A	A
1335	A	A
1336	G	G
1337	A	A
1338	T	C
1339	T	C
1340	T	T
1341	A	T
1342	A	A
1343	A	A
1344	T	C
1345	A	A
1346	C	C
1347	C	G
1348	A	A
1349	T	T
1350	G	G
1351	C	C
1352	T	T
1353	A	T
1354	A	A
1355	A	A
1356	C	T
1357	A	A
1358	C	C
1359	A	T
1360	G	G
1361	T	T
1362	G	T
1363	G	G
1364	G	G
1365	G	C
1366	G	G
1367	G	G
1368	A	C
1369	C	C
1370	A	A
1371	T	C
1372	C	C
1373	A	A
1374	A	A
1375	G	G
1376	C	C
1377	A	T
1378	G	G
1379	C	C
1380	C	G
1381	A	A
1382	T	T
1383	G	G
1384	C	C
1385	A	A
1386	A	A
1387	A	A
1388	T	T
1389	G	G
1390	T	C
1391	T	T
1392	A	T
1393	A	A
1394	A	A
1395	A	A
1396	G	G
1397	A	A
1398	G	A
1399	A	A
1400	C	C
1401	C	G
1402	A	A
1403	T	T
1404	C	A
1405	A	A
1406	A	A
1407	T	C
1408	G	G
1409	A	A
1410	G	G
1411	G	G
1412	A	A
1413	A	A
1414	G	G
1415	C	C
1416	T	G
1417	G	G
1418	C	C
1419	A	T
1420	G	G
1421	A	A
1422	A	A
1423	T	T
1424	G	G
1425	G	G
1426	G	G
1427	A	A
1428	T	C
1429	A	C
1430	G	G
1431	A	C
1432	T	C
1433	T	T
1434	G	T
1435	C	C
1436	A	A
1437	T	C
1438	C	C
1439	C	C
1440	A	T
1441	G	G
1442	T	T
1443	G	T
1444	C	C
1445	A	A
1446	T	C
1447	G	G
1448	C	C
1449	A	T
1450	G	G
1451	G	G
1452	G	C
1453	C	C
1454	C	C
1455	T	G
1456	A	A
1457	T	T
1458	T	C
1459	G	G
1460	C	C
1461	A	T
1462	C	C
1463	C	C
1464	A	T
1465	G	G
1466	G	G
1467	C	G
1468	C	C
1469	A	A
1470	G	A
1471	A	A
1472	T	T
1473	G	G
1474	A	C
1475	G	G
1476	A	C
1477	G	G
1478	A	A
1479	A	A
1480	C	C
1481	C	C
1482	A	T
1483	A	C
1484	G	G
1485	G	C
1486	G	G
1487	G	G
1488	A	C
1489	A	T
1490	G	C
1491	T	G
1492	G	G
1493	A	A
1494	C	T
1495	A	A
1496	T	T
1497	A	T
1498	G	G
1499	C	C
1500	A	T
1501	G	G
1502	G	G
1503	A	C
1504	A	A
1505	C	C
1506	T	G
1507	A	A
1508	C	C
1509	T	T
1510	A	A
1511	G	G						D"1509"
1512	T	T
1513	A	A
1514	C	C
1515	C	G				C
1516	C	C
1517	T	T
1518	T	G
1519	C	C
1520	A	A
1521	G	G
1522	G	G
1523	A	A
1524	A	A
1525	C	C
1526	A	A
1527	A	A
1528	A	A
1529	T	T
1530	A	T
1531	G	G
1532	G	G
1533	A	C
1534	T	T
1535	G	G
1536	G	G
1537	A	A
1538	T	T
1539	G	G
1540	A	A
1541	C	C
1542	A	T
1543	C	C
1544	A	A
1545	T	C
1546	A	A
1547	A	A
1548	T	C
1549	C	C
1550	C	C
1551	A	T
1552	C	C
1553	C	C
1554	T	G
1555	A	A
1556	T	T
1557	C	A
1558	C	C
1559	C	C
1560	A	T
1561	G	G
1562	T	T
1563	A	T
1564	G	G
1565	G	G
1566	A	C
1567	G	G
1568	A	A
1569	A	A
1570	A	A
1571	T	T
1572	C	A
1573	T	T
1574	A	A
1575	T	C
1576	A	A
1577	A	A
1578	A	A
1579	A	C
1580	G	G
1581	A	C
1582	T	T
1583	G	G
1584	G	G
1585	A	A
1586	T	T
1587	A	T
1588	A	A
1589	T	T
1590	C	A
1591	C	C
1592	T	T
1593	G	T
1594	G	G
1595	G	G
1596	A	C
1597	T	C
1598	T	T
1599	A	T
1600	A	A
1601	A	A
1602	T	C
1603	A	A
1604	A	A
1605	A	A
1606	A	A
1607	T	T
1608	A	T
1609	G	G
1610	T	T
1611	A	T
1612	A	C
1613	G	G
1614	A	C
1615	A	A
1616	T	T
1617	G	G
1618	T	T
1619	A	A
1620	T	C
1621	A	T
1622	G	C
1623	C	G
1624	C	C
1625	C	C
1626	T	G
1627	A	A
1628	C	C
1629	C	G
1630	A	A
1631	G	G
1632	C	C
1633	A	A
1634	T	T
1635	T	A
1636	C	C
1637	T	T
1638	G	T
1639	G	G
1640	A	A
1641	C	T
1642	A	A
1643	T	T
1644	A	T
1645	A	C
1646	G	G
1647	A	C
1648	C	C
1649	A	A
1650	A	A
1651	G	G
1652	G	G
1653	A	C
1654	C	C
1655	C	C
1656	A	T
1657	A	A
1658	A	A
1659	G	G
1660	G	G
1661	A	A
1662	A	A
1663	C	C
1664	C	C
1665	C	A
1666	T	T
1667	T	T
1668	T	C
1669	A	C
1670	G	G
1671	A	C
1672	G	G
1673	A	A
1674	C	T
1675	T	T
1676	A	A
1677	T	C
1678	G	G
1679	T	T
1680	A	T
1681	G	G
1682	A	A
1683	C	T
1684	C	C
1685	G	G
1686	A	C
1687	T	T
1688	T	T
1689	C	T
1690	T	T
1691	A	A
1692	T	C
1693	A	A
1694	A	A
1695	A	A
1696	A	A
1697	C	C
1698	T	G
1699	C	C
1700	T	T
1701	A	T
1702	A	C
1703	G	G
1704	A	C
1705	G	G
1706	C	C
1707	C	G
1708	G	G
1709	A	A
1710	G	A
1711	C	C
1712	A	A
1713	A	A
1714	G	G
1715	C	C
1716	T	A
1717	T	T
1718	C	C
1719	A	T
1720	C	C
1721	A	A
1722	A	A
1723	G	G
1724	A	A
1725	G	G
1726	G	G						D"1725"
1727	T	T
1728	A	T
1729	A	A
1730	A	A
1731	A	A
1732	A	A
1733	A	A
1734	T	C
1735	T	T
1736	G	G
1737	G	G
1738	A	A
1739	T	T
1740	G	G
1741	A	A
1742	C	C
1743	A	T
1744	G	G
1745	A	A
1746	A	A
1747	A	A
1748	C	C
1749	C	A
1750	T	C
1751	T	T
1752	G	T
1753	T	C
1754	T	T
1755	G	T
1756	G	G
1757	T	T
1758	C	G
1759	C	C
1760	A	A
1761	A	A
1762	A	A
1763	A	A
1764	T	C
1765	G	G
1766	C	C
1767	G	T
1768	A	A
1769	A	A
1770	C	T
1771	C	C
1772	C	C
1773	A	T
1774	G	G
1775	A	A
1776	T	C
1777	T	T
1778	G	G
1779	T	C
1780	A	A
1781	A	A
1782	G	A
1783	A	A
1784	C	C
1785	T	G
1786	A	A
1787	T	T
1788	T	A
1789	T	C
1790	T	T
1791	A	T
1792	A	A
1793	A	A
1794	A	A
1795	G	G
1796	C	C
1797	A	T
1798	T	C
1799	T	T
1800	G	T
1801	G	G
1802	G	G
1803	A	C
1804	C	C
1805	C	C
1806	A	T
1807	G	G
1808	G	G
1809	A	C
1810	G	G
1811	C	C
1812	G	T
1813	A	A
1814	C	C
1815	A	T
1816	C	C
1817	T	T
1818	A	T
1819	G	G
1820	A	A
1821	A	A
1822	G	G
1823	A	A
1824	A	A
1825	A	A
1826	T	T
1827	G	G
1828	A	A
1829	T	T
1830	G	G
1831	A	A
1832	C	C
1833	A	T
1834	G	G
1835	C	C
1836	A	T
1837	T	T
1838	G	G
1839	T	C
1840	C	C
1841	A	A
1842	G	G
1843	G	G
1844	G	G
1845	A	C
1846	G	G
1847	T	T
1848	G	T
1849	G	G
1850	G	G
1851	G	C
1852	G	G
1853	G	G
1854	A	C
1855	C	C
1856	C	C
1857	C	G
1858	G	G
1859	G	G
1860	C	G
1861	C	C
1862	A	A
1863	T	C
1864	A	A
1865	A	A
1866	A	A
1867	G	G
1868	C	C
1869	A	T
1870	A	C
1871	G	G
1872	A	C
1873	G	G
1874	T	T
1875	T	A
1876	T	C
1877	T	T
1878	G	T
1879	G	G
1880	C	C
1881	T	G
1882	G	G
1883	A	A
1884	A	A
1885	G	G
1886	C	C
1887	A	T
1888	A	A
1889	T	T
1890	G	G
1891	A	A
1892	G	G
1893	C	C
1894	C	C
1895	A	A
1896	A	A
1897	G	G
1898	T	T
1899	A	T
1900	A	A
1901	C	C
1902	A	T
1903	A	A
1904	A	A
1905	T	C
1906	C	C
1907	C	C
1908	A	T
1909	G	G
1910	C	C
1911	T	G
1912	A	A
1913	C	C
1914	C	G
1915	A	A
1916	T	T
1917	A	T
1918	A	A
1919	T	T
1920	G	G
1921	A	A
1922	T	T
1923	A	T
1924	C	C
1925	A	A
1926	G	A
1927	A	A
1928	A	A
1929	A	A
1930	G	G
1931	G	G
1932	C	G
1933	A	A
1934	A	A
1935	T	C
1936	T	T
1937	T	T
1938	T	C
1939	A	C
1940	G	G
1941	G	C
1942	A	A
1943	A	A
1944	C	T
1945	C	C
1946	A	A
1947	A	A
1948	A	C
1949	G	G
1950	A	C
1951	A	A
1952	A	A
1953	G	A
1954	A	A
1955	C	C
1956	T	G
1957	G	G
1958	T	T
1959	T	G
1960	A	A
1961	A	A
1962	G	A
1963	T	T
1964	G	G
1965	T	C
1966	T	T
1967	T	T
1968	C	T
1969	A	A
1970	A	A
1971	T	C
1972	T	T
1973	G	G
1974	T	C
1975	G	G
1976	G	G
1977	C	G
1978	A	A
1979	A	A
1980	A	A
1981	G	G
1982	A	A
1983	A	A
1984	G	G
1985	G	G
1986	G	C
1987	C	C
1988	A	A
1989	C	T
1990	A	A
1991	T	T
1992	A	T
1993	G	G
1994	C	C
1995	C	G
1996	A	A
1997	A	A
1998	A	A
1999	A	A
[truncated: 8,262 more rows]
